# Supplementary material for: A Comparison of Fresh and Frozen Lamb Meat—Differences in Technological Meat Quality and Sensory Attributes
Source: MDPI journal article supplement (doi:10.3390/ani12202830), 2022-10-18
Supplement: s1 [file s1]

## Supplementary data

Table S1. Definitions of the sensory attributes tested.

| Sensory attribute | Short name | Scale           | Definition                                                                                       |
|-------------------|------------|-----------------|--------------------------------------------------------------------------------------------------|
| <i>ODOUR</i>      |            |                 |                                                                                                  |
| Frying            | O-frying   | none    much    | Odour of fried lamb meat                                                                         |
| Sour              | O-sour     | none    much    | Sour odour of fresh lamb meat                                                                    |
| Fatty             | O-fatty    | none    much    | Lamb fat, wool                                                                                   |
| Liver             | O-liver    | none    much    | Odour of lamb liver, blood, iron, game                                                           |
| <i>APPEARANCE</i> |            |                 |                                                                                                  |
| Colour            | A-colour   | light    dark   | Colour of sample's cutted surface                                                                |
| <i>FLAVOUR</i>    |            |                 |                                                                                                  |
| Frying            | F-frying   | none    much    | Flavour of fried lamb meat                                                                       |
| Sour              | F-sour     | none    much    | Sour flavour of fresh lamb meat                                                                  |
| Fatty             | F-fatty    | none    much    | Flavour of lamb fat, wool                                                                        |
| Sweet             | F-sweet    | none    much    | Sweet flavour                                                                                    |
| Liver             | F-liver    | none    much    | Flavour of lamb liver, blood, iron, game                                                         |
| <i>TEXTURE</i>    |            |                 |                                                                                                  |
| Soft              | T-soft     | firm    soft    | First bite, cut a piece from the middle of the sample and bite transversely on the muscle fibers |
| Tender            | T-tender   | tough    tender | How tough or tender is the meat when chewing                                                     |
| Juicy             | T-juicy    | dry    juicy    | Dry - draws juice from mouth; juicy- releases juice                                              |
| Mushy             | T-mushy    | none    much    | Mushy, lamb paté                                                                                 |

Table S2. Fresh meat, with individual data on technological meat quality attributes (colour, cooking loss and WBSF) and sensory attributes (Small = Small-scale slaughter system, Large = Large-scale slaughter system).

| Slaughter system              | Small |
|-------------------------------|-------|-------|-------|-------|-------|-------|-------|-------|-------|-------|
| Animal ID                     | 1189  | 1581  | 1685  | 1465  | 1533  | 1812  | 1570  | 1389  | 1699  | 1872  |
| Lamb pair                     | 1     | 2     | 3     | 4     | 5     | 6     | 7     | 8     | 9     | 10    |
| L*                            | 37.0  | 38.1  | 36.2  | 35.2  | 34.0  | 36.3  | 37.2  | 35.4  | 39.3  | 36.7  |
| a*                            | 19.7  | 18.8  | 20.8  | 20.4  | 18.4  | 15.1  | 17.4  | 20.8  | 15.6  | 21.1  |
| b*                            | 5.3   | 3.9   | 5.1   | 3.6   | 2.8   | 2.3   | 3.2   | 6.2   | 3.3   | 5.9   |
| Cooking loss (%)              | 14.2  | 17.4  | 9.3   | 16.7  | 11.9  | 9.3   | 19.8  | 14.4  | 12.0  | 13.7  |
| WBSF (N) <sup>a</sup>         | 87.2  | 39.6  | 49.7  | 38.4  | 54.0  | 46.9  | 56.6  | 43.4  | 41.8  | 32.8  |
| Frying odour <sup>b</sup>     | 25    | 30    | 43    | 35    | 29    | 33    | 30    | 46    | 29    | 30    |
| Sour odour <sup>b</sup>       | 9     | 17    | 17    | 9     | 22    | 13    | 11    | 11    | 12    | 8     |
| Fatty odour <sup>b</sup>      | 28    | 28    | 23    | 31    | 30    | 29    | 22    | 28    | 27    | 29    |
| Liver odour <sup>b</sup>      | 31    | 29    | 30    | 32    | 33    | 25    | 23    | 29    | 24    | 38    |
| Colour apperance <sup>b</sup> | 30    | 30    | 42    | 26    | 35    | 31    | 34    | 32    | 34    | 38    |
| Frying flavour <sup>b</sup>   | 24    | 25    | 26    | 21    | 27    | 23    | 24    | 38    | 27    | 22    |
| Sour flavour <sup>b</sup>     | 17    | 23    | 25    | 31    | 25    | 28    | 28    | 16    | 26    | 25    |
| Fatty flavour <sup>b</sup>    | 17    | 17    | 16    | 14    | 22    | 13    | 18    | 22    | 23    | 17    |
| Sweet flavour <sup>b</sup>    | 8     | 9     | 11    | 9     | 7     | 10    | 8     | 10    | 8     | 9     |
| Liver flavour <sup>b</sup>    | 42    | 47    | 50    | 45    | 37    | 36    | 34    | 38    | 35    | 42    |
| Soft texture <sup>b</sup>     | 40    | 54    | 66    | 28    | 35    | 45    | 36    | 66    | 34    | 69    |
| Tender texture <sup>b</sup>   | 36    | 51    | 63    | 26    | 29    | 53    | 29    | 69    | 29    | 71    |
| Juicy texture <sup>b</sup>    | 49    | 37    | 60    | 39    | 34    | 54    | 42    | 67    | 42    | 62    |
| Muschy texture <sup>b</sup>   | 12    | 14    | 15    | 10    | 13    | 19    | 11    | 16    | 12    | 22    |
| Slaughter system              | Large |
| Animal ID                     | 2812  | 2699  | 2872  | 2685  | 2389  | 2533  | 2189  | 2465  | 2570  | 2581  |
| Lamb pair                     | 6     | 9     | 10    | 3     | 8     | 5     | 1     | 4     | 7     | 2     |

|                                |       |      |   |       |      |   |          |      |      |         |
|--------------------------------|-------|------|---|-------|------|---|----------|------|------|---------|
| L*                             | 37.0  | 40.1 | . | 39.1  | 36.4 | . | 37.5     | 39.9 | 38.8 | 39.0    |
| a*                             | 20.9  | 19.5 | . | 20.4  | 21.3 | . | 20.2     | 18.1 | 19.5 | 20.7    |
| b*                             | 4.1   | 5.3  | . | 5.9   | 5.2  | . | 3.9      | 4.6  | 4.3  | 5.5     |
| Cooking loss (%)               | 18.2  | 18.5 | . | 11.8  | 17.4 | . | 14.7     | 15.1 | 13.3 | 16.1    |
| WBSF (N) <sup>a</sup>          | 32.6  | 37.4 | . | 49.5  | 48.3 | . | 50.7     | 49.5 | 43.8 | 25.5    |
| Frying odour <sup>b</sup>      | 22    | 55   | . | 24    | 35   | . | 30       | 40   | 36   | 21      |
| Sour odour <sup>b</sup>        | 15    | 10   | . | 9     | 17   | . | 9        | 12   | 13   | 11      |
| Fatty odour <sup>b</sup>       | 28    | 25   | . | 28    | 31   | . | 20       | 32   | 29   | 26      |
| Liver odour <sup>b</sup>       | 35    | 32   | . | 29    | 20   | . | 27       | 34   | 33   | 30      |
| Colour appearance <sup>b</sup> | 27    | 30   | . | 34    | 25   | . | 27       | 36   | 29   | 25      |
| Frying flavour <sup>b</sup>    | 20    | 31   | . | 22    | 23   | . | 20       | 25   | 24   | 19      |
| Sour flavour <sup>b</sup>      | 30    | 32   | . | 19    | 22   | . | 19       | 31   | 27   | 32      |
| Fatty flavour <sup>b</sup>     | 15    | 18   | . | 11    | 15   | . | 11       | 14   | 19   | 17      |
| Sweet flavour <sup>b</sup>     | 11    | 13   | . | 7     | 9    | . | 7        | 9    | 8    | 10      |
| Liver flavour <sup>b</sup>     | 47    | 47   | . | 35    | 40   | . | 35       | 46   | 44   | 39      |
| Soft texture <sup>b</sup>      | 64    | 64   | . | 38    | 47   | . | 46       | 48   | 44   | 72      |
| Tender texture <sup>b</sup>    | 58    | 69   | . | 34    | 43   | . | 45       | 42   | 43   | 72      |
| Juicy texture <sup>b</sup>     | 57    | 51   | . | 38    | 47   | . | 50       | 49   | 46   | 62      |
| Muschy texture <sup>b</sup>    | 19    | 24   | . | 11    | 13   | . | 17       | 13   | 16   | 26      |
| <sup>a</sup> Warner-Bratzler   | shear |      |   | force |      |   | measured |      | in   | Newton. |

<sup>b</sup>Sensory attributes was scored on a scale from 0-100, with 100 being the highest score.

Table S3. Frozen meat, individual data on technological meat quality attributes (colour, cooking loss and WBSF) and sensory attributes (Small = Small-scale slaughter system, Large = Large-scale slaughter system).

| Slaughter system               | Small |
|--------------------------------|-------|-------|-------|-------|-------|-------|-------|-------|-------|-------|
| Animal ID                      | 1189  | 1581  | 1685  | 1465  | 1533  | 1812  | 1570  | 1389  | 1699  | 1872  |
| Lamb pair                      | 1     | 2     | 3     | 4     | 5     | 6     | 7     | 8     | 9     | 10    |
| L*                             | 36.0  | 36.0  | 35.9  | 37.5  | 36.9  | 35.7  | 38.4  | 35.6  | 37.0  | 36.6  |
| a*                             | 19.7  | 18.2  | 22.0  | 20.2  | 18.8  | 16.5  | 16.5  | 18.8  | 18.2  | 21.5  |
| b*                             | 6.7   | 7.0   | 7.0   | 8.2   | 6.7   | 4.7   | 3.4   | 4.1   | 5.9   | 7.5   |
| Cooking loss (%)               | 26.7  | 29.9  | 22.2  | 26.2  | 28.2  | 23.1  | 32.7  | 23.6  | 18.2  | 27.7  |
| WBSF (N) <sup>a</sup>          | 73.6  | 40.2  | 38.9  | 30.9  | 56.8  | 73.7  | 58.3  | 27.1  | 46.6  | 30.2  |
| Frying odour <sup>b</sup>      | 31    | 41    | 33    | 34    | 43    | 27    | 29    | 31    | 29    | 45    |
| Sour odour <sup>b</sup>        | 16    | 13    | 15    | 16    | 10    | 15    | 12    | 20    | 13    | 11    |
| Fatty odour <sup>b</sup>       | 31    | 27    | 30    | 31    | 26    | 37    | 35    | 39    | 32    | 25    |
| Liver odour <sup>b</sup>       | 32    | 34    | 35    | 26    | 26    | 31    | 37    | 33    | 23    | 34    |
| Colour appearance <sup>b</sup> | 37    | 19    | 35    | 30    | 31    | 40    | 31    | 32    | 36    | 38    |
| Frying flavour <sup>b</sup>    | 25    | 32    | 30    | 21    | 30    | 30    | 26    | 20    | 20    | 34    |
| Sour flavour <sup>b</sup>      | 15    | 36    | 29    | 27    | 28    | 27    | 3     | 43    | 19    | 25    |
| Fatty flavour <sup>b</sup>     | 21    | 17    | 23    | 21    | 18    | 33    | 29    | 19    | 26    | 23    |
| Sweet flavour <sup>b</sup>     | 13    | 11    | 10    | 10    | 9     | 6     | 10    | 8     | 14    | 8     |
| Liver flavour <sup>b</sup>     | 36    | 44    | 44    | 55    | 35    | 48    | 46    | 44    | 45    | 48    |
| Soft texture <sup>b</sup>      | 52    | 62    | 44    | 72    | 36    | 33    | 47    | 64    | 70    | 58    |
| Tender texture <sup>b</sup>    | 45    | 60    | 42    | 70    | 32    | 28    | 46    | 64    | 69    | 55    |
| Juicy texture <sup>b</sup>     | 26    | 34    | 43    | 48    | 23    | 26    | 30    | 45    | 56    | 36    |
| Muschy texture <sup>b</sup>    | 17    | 12    | 10    | 11    | 9     | 6     | 14    | 21    | 21    | 15    |
| Slaughter system               | Large |
| Animal ID                      | 2812  | 2699  | 2872  | 2685  | 2389  | 2533  | 2189  | 2465  | 2570  | 2581  |
| Lamb pair                      | 6     | 9     | 10    | 3     | 8     | 5     | 1     | 4     | 7     | 2     |
| L*                             | 37.9  | 38.2  | 36.0  | 36.6  | 34.7  | 34.0  | 37.1  | 38.2  | 36.5  | 39.8  |
| a*                             | 19.0  | 18.2  | 19.3  | 18.9  | 18.6  | 19.5  | 19.1  | 17.0  | 17.4  | 18.3  |
| b*                             | 6.8   | 7.1   | 5.9   | 5.6   | 5.0   | 5.0   | 6.7   | 6.3   | 2.9   | 7.3   |
| Cooking loss (%)               | 27.7  | 29.3  | 30.3  | 25.2  | 28.5  | 29.6  | 25.6  | 27.2  | 26.8  | 28.6  |

|                                                                                                     |       |      |       |      |          |      |      |      |         |      |
|-----------------------------------------------------------------------------------------------------|-------|------|-------|------|----------|------|------|------|---------|------|
| WBSF (N) <sup>a</sup>                                                                               | 42.6  | 55.5 | 57.3  | 57.3 | 52.3     | 65.3 | 55.6 | 50.4 | 54.4    | 46.3 |
| Frying odour <sup>b</sup>                                                                           | 38    | 38   | 44    | 37   | 28       | 37   | 39   | 31   | 33      | 50   |
| Sour odour <sup>b</sup>                                                                             | 18    | 17   | 9     | 16   | 13       | 16   | 11   | 14   | 12      | 17   |
| Fatty odour <sup>b</sup>                                                                            | 28    | 36   | 28    | 27   | 46       | 24   | 29   | 23   | 49      | 28   |
| Liver odour <sup>b</sup>                                                                            | 28    | 30   | 24    | 36   | 31       | 37   | 37   | 36   | 33      | 33   |
| Colour apperance <sup>b</sup>                                                                       | 24    | 24   | 30    | 36   | 22       | 38   | 24   | 19   | 37      | 23   |
| Frying flavour <sup>b</sup>                                                                         | 33    | 26   | 40    | 35   | 22       | 21   | 31   | 25   | 24      | 45   |
| Sour flavour <sup>b</sup>                                                                           | 36    | 38   | 28    | 27   | 37       | 21   | 41   | 46   | 28      | 36   |
| Fatty flavour <sup>b</sup>                                                                          | 27    | 19   | 16    | 22   | 19       | 16   | 17   | 17   | 24      | 27   |
| Sweet flavour <sup>b</sup>                                                                          | 8     | 10   | 9     | 10   | 8        | 9    | 9    | 9    | 8       | 8    |
| Liver flavour <sup>b</sup>                                                                          | 48    | 48   | 42    | 46   | 36       | 37   | 43   | 51   | 49      | 48   |
| Soft texture <sup>b</sup>                                                                           | 75    | 45   | 54    | 43   | 32       | 36   | 49   | 47   | 51      | 75   |
| Tender texture <sup>b</sup>                                                                         | 72    | 44   | 49    | 40   | 32       | 30   | 41   | 40   | 58      | 72   |
| Juicy texture <sup>b</sup>                                                                          | 52    | 32   | 34    | 29   | 20       | 21   | 25   | 25   | 42      | 52   |
| Muschy texture <sup>b</sup>                                                                         | 16    | 12   | 15    | 13   | 13       | 11   | 13   | 10   | 14      | 16   |
| <sup>a</sup> Warner-Bratzler                                                                        | shear |      | force |      | measured |      | in   |      | Newton. |      |
| <sup>b</sup> Sensory attributes was scored on a scale from 0-100, with 100 being the highest score. |       |      |       |      |          |      |      |      |         |      |

Table S4. Translational relaxation parameters and water population within muscle samples from fresh meat (Small = Small-scale slaughter system, Large = Large-scale slaughter system).

| Small scale slaughter system, Large |       |       | Large scale slaughter system. |            |       |       |       |            |       |       |
|-------------------------------------|-------|-------|-------------------------------|------------|-------|-------|-------|------------|-------|-------|
| Slaughter system                    | Small | Small | Small                         | Small      | Small | Small | Small | Small      | Small | Small |
| Animal ID                           | 1189  | 1581  | 1685                          | 1465       | 1533  | 1812  | 1570  | 1389       | 1699  | 1872  |
| Lamb pair                           | 1     | 2     | 3                             | 4          | 5     | 6     | 7     | 8          | 9     | 10    |
| T2b <sup>a</sup>                    | 24.1  | 23.6  | 8.3                           | 16.9       | 11.9  | 13.1  | 19.7  | 8.6        | 8.5   | 11.0  |
| T21 <sup>a</sup>                    | 52.2  | 56.0  | 45.3                          | 50.7       | 44.2  | 45.3  | 51.5  | 46.4       | 46.7  | 51.0  |
| T22 <sup>a</sup>                    | 313.1 | 379.6 | 182.3                         | 236.4      | 169.0 | 232.7 | 267.5 | 166.5      | 156.8 | 173.0 |
| A2b <sup>b</sup>                    | 19.0  | 15.4  | 4.3                           | 14.6       | 4.8   | 6.8   | 16.9  | 3.6        | 4.1   | 5.1   |
| A21 <sup>b</sup>                    | 73.0  | 76.4  | 86.4                          | 73.8       | 87.4  | 85.2  | 72.5  | 86.5       | 84.1  | 82.4  |
| A22 <sup>b</sup>                    | 8.0   | 8.2   | 9.3                           | 11.6       | 7.9   | 8.0   | 10.5  | 10.0       | 11.7  | 12.4  |
| Slaughter system                    | Large | Large | Large                         | Large      | Large | Large | Large | Large      | Large | Large |
| Animal ID                           | 2812  | 2699  | 2872                          | 2685       | 2389  | 2533  | 2189  | 2465       | 2570  | 2581  |
| Lamb pair                           | 6     | 9     | 10                            | 3          | 8     | 5     | 1     | 4          | 7     | 2     |
| T2b <sup>a</sup>                    | 18.8  | 5.9   | .                             | 28.6       | 5.1   | .     | 12.6  | 10.5       | 14.2  | 5.0   |
| T21 <sup>a</sup>                    | 53.9  | 46.7  | .                             | 58.4       | 44.3  | .     | 47.7  | 44.2       | 48.4  | 44.3  |
| T22 <sup>a</sup>                    | 312.2 | 143.6 | .                             | 432.6      | 127.0 | .     | 221.3 | 178.4      | 251.4 | 97.1  |
| A2b <sup>b</sup>                    | 9.2   | 3.4   | .                             | 30.9       | 3.2   | .     | 9.1   | 4.3        | 7.5   | 3.0   |
| A21 <sup>b</sup>                    | 85.5  | 86.0  | .                             | 60.8       | 85.2  | .     | 82.8  | 88.3       | 85.0  | 83.8  |
| A22 <sup>b</sup>                    | 5.3   | 10.6  | .                             | 8.3        | 11.6  | .     | 8.1   | 7.4        | 7.5   | 13.2  |
| <sup>a</sup> Translational          |       |       |                               | relaxation |       |       |       | parameters |       |       |

Table S5. Translational relaxation parameters and water population in muscle samples after freezing (Small = Small-scale slaughter system, Large = Large-scale slaughter system).

| Slaughter system | Small |
|------------------|-------|-------|-------|-------|-------|-------|-------|-------|-------|-------|
| Animal ID        | 1189  | 1581  | 1685  | 1465  | 1533  | 1812  | 1570  | 1389  | 1699  | 1872  |
| Lamb pair        | 1     | 2     | 3     | 4     | 5     | 6     | 7     | 8     | 9     | 10    |
| T2b <sup>a</sup> | 5.2   | 7.7   | 16.1  | .     | .     | 22.4  | 16.5  | 11.0  | 6.4   | 14.4  |
| T21 <sup>a</sup> | 37.5  | 41.5  | 42.2  | .     | .     | 42.2  | 37.2  | 37.0  | 40.1  | 43.7  |
| T22 <sup>a</sup> | 89.1  | 96.4  | 130.3 | .     | .     | 108.3 | 81.3  | 71.2  | 98.9  | 131.5 |
| A2b <sup>b</sup> | 3.5   | 3.3   | 8.9   | .     | .     | 16.1  | 9.2   | 2.8   | 3.5   | 6.8   |
| A21 <sup>b</sup> | 82.6  | 83.0  | 81.4  | .     | .     | 76.8  | 74.7  | 74.4  | 83.5  | 79.9  |

|                  |       |       |       |       |       |       |       |       |       |       |
|------------------|-------|-------|-------|-------|-------|-------|-------|-------|-------|-------|
| A22 <sup>b</sup> | 14.0  | 13.7  | 9.7   | .     | .     | 7.1   | 16.1  | 22.7  | 12.9  | 13.3  |
| Slaughter system | Large |
| Animal ID        | 2812  | 2699  | 2872  | 2685  | 2389  | 2533  | 2189  | 2465  | 2570  | 2581  |
| Lamb pair        | 6     | 9     | 10    | 3     | 8     | 5     | 1     | 4     | 7     | 2     |
| T2b <sup>a</sup> | 5.3   | 25.1  | 11.3  | 6.7   | 36.6  | 9.8   | 2.7   | 10.9  | 7.4   | 2.1   |
| T21 <sup>a</sup> | 42.1  | 44.1  | 44.1  | 40.1  | 54.6  | 41.7  | 34.5  | 39.3  | 38.7  | 38.2  |
| T22 <sup>a</sup> | 91.9  | 129.6 | 132.6 | 120.3 | 118.0 | 127.9 | 75.5  | 114.1 | 100.6 | 89.8  |
| A2b <sup>b</sup> | 2.8   | 14.6  | 5.1   | 4.0   | 65.1  | 5.5   | 3.3   | 4.6   | 3.4   | 3.4   |
| A21 <sup>b</sup> | 80.8  | 77.6  | 83.5  | 82.7  | 26.5  | 82.0  | 80.3  | 85.3  | 86.3  | 80.3  |
| A22 <sup>b</sup> | 16.4  | 7.8   | 11.4  | 13.3  | 8.4   | 12.5  | 16.4  | 10.1  | 10.3  | 16.3  |

<sup>a</sup>Translational relaxation parameters.

<sup>b</sup>Water population within muscle sample.
